# Supplementary material for: Electrochemical reduction method for leaching terbium and cerium from waste phosphors
Source: Royal Society of Chemistry journal article supplement (doi:10.1039/d4ra06334a), 2024-01-01
Supplement: d4ra06334a1.pdf [file d4ra06334a1.pdf]

## Supporting Information

### Relationship between $1-(1-x)^{1/3}$ and time

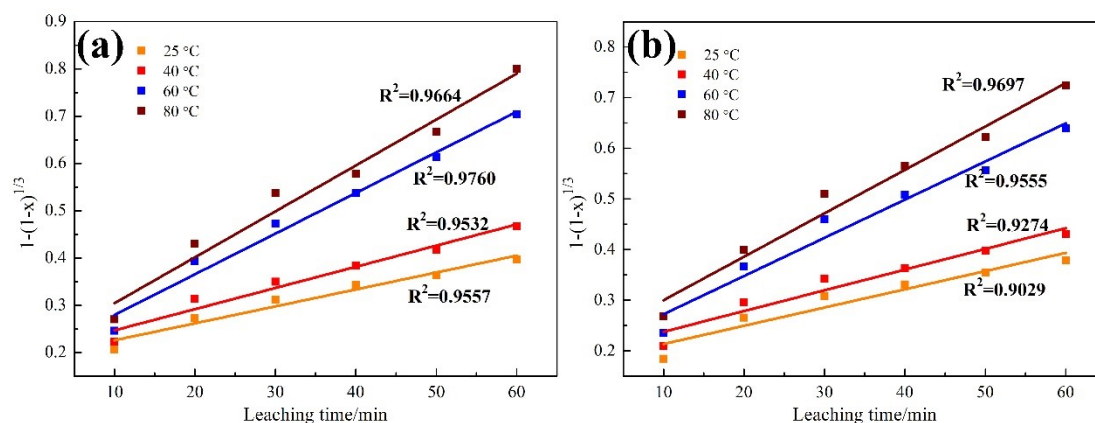

**Fig. S1.** Plots of  $1-(1-x)^{1/3}$  vs. time at various temperatures for (a) Tb, and (b)

Ce

### XRD pattern of the original phosphors

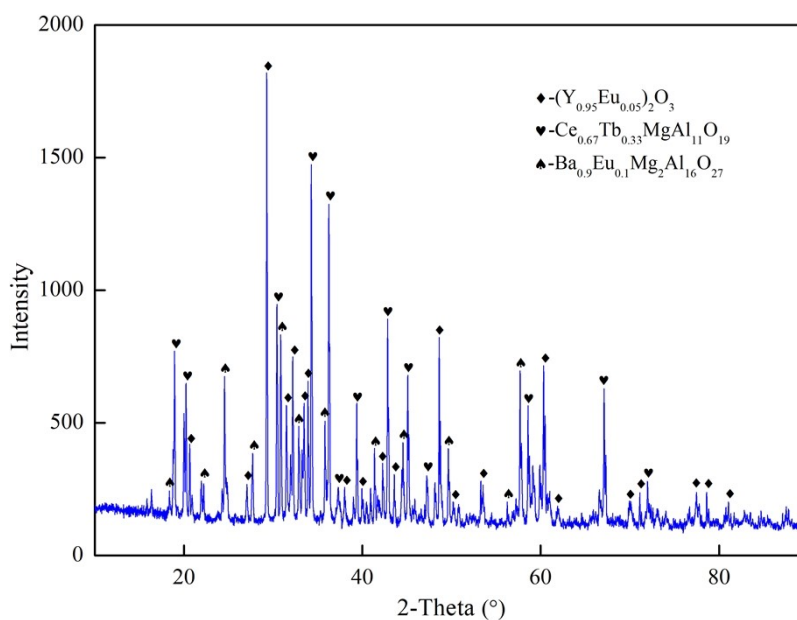

**Fig. S2.** XRD pattern of the original phosphors.
